# Supplementary material for: Diversity Profile of Microbes Associated with Anaerobic Sulfur Oxidation in an Upflow Anaerobic Sludge Blanket Reactor Treating Municipal Sewage
Source: PubMed Central journal article supplement (PMC4462926; doi:10.1264/jsme2.me14105), 2015-03-28
Supplement: 30_157_s1.pdf [file 30_157_s1.pdf]

## Supplemental Material

**Table S1.** Diversity indices of the UASB sludge samples

| Sample (day) | Anaerobic sulfur reduction/oxidation | Number of sequence | Number of OTU | Chao1 | Coverage (%) | PD*    | Shannon* | Simpson* |
|--------------|--------------------------------------|--------------------|---------------|-------|--------------|--------|----------|----------|
| 91           | Reduction                            | 14343              | 5823          | 36628 | 65           | 258.94 | 9.16     | 0.97     |
| 111          | Reduction                            | 15096              | 6007          | 30853 | 66           | 245.38 | 8.97     | 0.96     |
| 167          | Oxidation                            | 17752              | 8156          | 47198 | 60           | 298.38 | 9.97     | 0.98     |
| 214          | Oxidation                            | 21972              | 10254         | 63745 | 60           | 312.42 | 10.34    | 0.99     |
| 255          | Oxidation                            | 16233              | 7719          | 43872 | 59           | 294.50 | 10.21    | 0.99     |
| 284          | Reduction                            | 11836              | 5717          | 34783 | 58           | 289.77 | 10.11    | 0.99     |
| 335          | Reduction                            | 16213              | 7444          | 44072 | 60           | 291.35 | 9.93     | 0.98     |
| 363          | Reduction                            | 13716              | 5207          | 29837 | 68           | 235.85 | 8.91     | 0.96     |
| 379          | Reduction                            | 13756              | 5191          | 29366 | 68           | 233.32 | 8.69     | 0.95     |
| 406          | Reduction                            | 15017              | 5647          | 31792 | 68           | 241.72 | 8.97     | 0.97     |
| 421          | Reduction                            | 15512              | 5317          | 29618 | 71           | 219.46 | 8.48     | 0.95     |
| 453          | Reduction                            | 15590              | 5874          | 30759 | 68           | 231.66 | 8.74     | 0.96     |
| 537          | Oxidation                            | 14001              | 5988          | 37038 | 63           | 284.03 | 9.18     | 0.96     |
| 634          | Reduction                            | 17354              | 7740          | 43674 | 62           | 283.90 | 9.91     | 0.99     |
| 699          | Reduction                            | 22886              | 9205          | 46527 | 66           | 262.72 | 9.55     | 0.98     |
| 747          | Reduction                            | 18635              | 7690          | 40045 | 65           | 266.06 | 9.38     | 0.97     |

Abbreviation: OTU - Operational taxonomic unit; PD - Phylogenetic diversity

\*Calculations determined at 0.03 dissimilarity based on 10,000 reads.
